# Supplementary material
Source: Springer Nature journal article supplement (https://www.springermedizin.de/resource/supplementary/12931_2013_1383_MOESM3_ESM.pdf/9426148)

### A. Ciliated cell

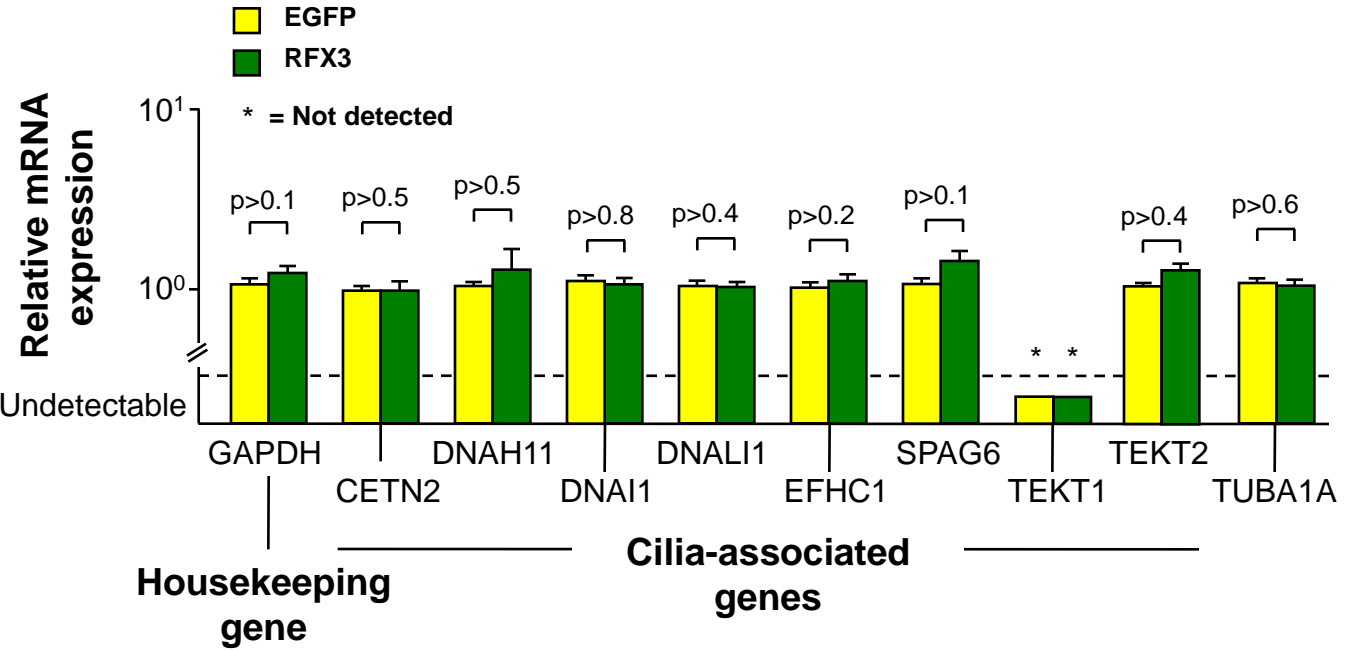

### B. Basal cell

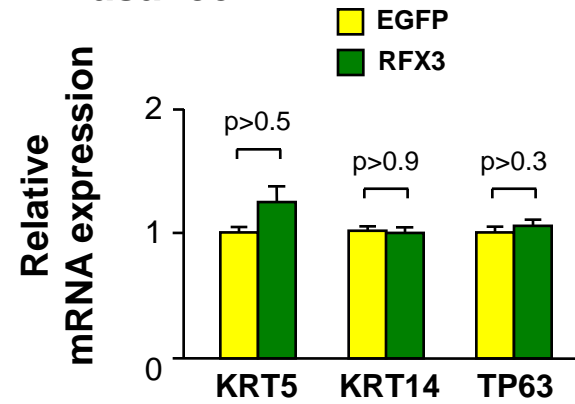

### C. Secretory cell

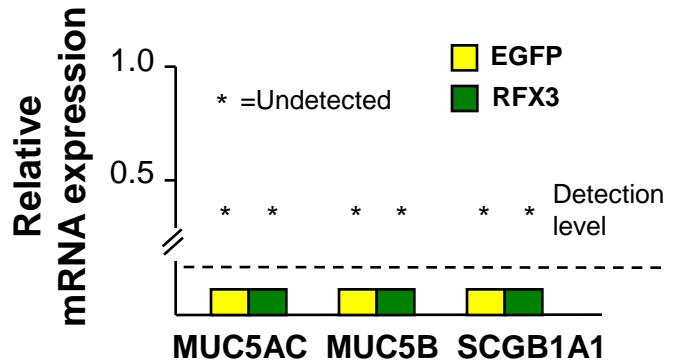

Supplement: MOESM3 [file 9426148]
